# Supplementary material for: An efficient propagation system through stem cuttings of a multipurpose plant—Ficus tikoua Bur
Source: PeerJ. 2024 Dec 24;12:e18768. doi: 10.7717/peerj.18768 (PMC11674247; doi:10.7717/peerj.18768)
Supplement: Supplemental Information 1 [file peerj-12-18768-s001.xlsx]

## Sheet: Table 1
	Number of Segments with Lateral Branches
	Test	Grassland			Sandy			Rocky			Understory
		Repeat 1	Repeat 2	Repeat 3	Repeat 1	Repeat 2	Repeat 3	Repeat 1	Repeat 2	Repeat 3	Repeat 1	Repeat 2	Repeat 3
	H1 (6, 0.3~0.5)	10	9	15	11	13	15	9	8	11	9	8	5
	H2(8, 0.3~0.5)	12	14	17	13	16	19	10	11	13	8	11	9
	H3(10, 0.3~0.5)	19	17	20	19	20	21	16	18	15	11	14	12
	H4(12, 0.3~0.5)	18	15	16	17	15	18	9	12	13	5	7	10
	H5(6, 0.5~0.7)	12	14	15	15	19	21	13	15	12	16	19	17
	H6(8, 0.5~0.7)	19	17	21	17	22	23	17	19	20	19	20	19
	H7(10, 0.5~0.7)	29	25	28	22	25	29	20	21	23	22	23	20
	H8(12, 0.5~0.7)	23	19	22	26	28	29	18	19	22	24	23	26
	H9(6, 0.7~1.0)	11	9	14	13	10	15	6	8	10	7	12	9
	H10(8, 0.7~1.0)	13	14	17	20	15	17	9	10	12	15	15	13
	H11(10, 0.7~1.0)	20	22	19	23	21	24	17	14	16	17	19	16
	H12(12, 0.7~1.0)	17	19	16	15	17	18	15	12	11	12	16	14
	Number Lateral Branches
	Test	Grassland			Sandy			Rocky			Understory
		Repeat 1	Repeat 2	Repeat 3	Repeat 1	Repeat 2	Repeat 3	Repeat 1	Repeat 2	Repeat 3	Repeat 1	Repeat 2	Repeat 3
	H1 (6, 0.3~0.5)	13	11	18	19	21	24	12	16	14	10	13	15
	H2(8, 0.3~0.5)	20	19	23	23	27	33	16	19	23	15	18	20
	H3(10, 0.3~0.5)	26	28	29	32	34	37	26	31	29	23	27	30
	H4(12, 0.3~0.5)	22	20	22	26	31	34	19	23	25	17	22	19
	H5(6, 0.5~0.7)	27	26	32	29	28	36	23	25	32	21	25	28
	H6(8, 0.5~0.7)	35	42	47	37	46	53	27	33	37	30	37	34
	H7(10, 0.5~0.7)	59	55	68	53	57	62	36	41	43	42	48	37
	H8(12, 0.5~0.7)	43	49	53	59	65	70	28	32	34	46	53	50
	H9(6, 0.7~1.0)	21	19	24	23	29	30	11	15	20	9	14	17
	H10(8, 0.7~1.0)	33	31	29	30	36	37	19	25	32	17	25	28
	H11(10, 0.7~1.0)	35	37	41	35	39	46	27	31	29	31	34	37
	H12(12, 0.7~1.0)	27	22	25	24	27	29	20	23	25	27	30	35

## Sheet: Table 2
	Total Number of Root						Number of Rooting Segments
	Test	R1	R2	R3			Test	R1	R2	R3
Grassland	D1	58	72	78		Grassland	D1	17	18	23
	D2	86	93	109			D2	21	22	25
	D3	134	167	184			D3	22	25	29
	D4	184	205	223			D4	27	28	30
Sandy	D1	65	72	88		Sandy	D1	19	21	24
	D2	91	97	112			D2	22	23	26
	D3	126	141	156			D3	24	27	28
	D4	193	218	234			D4	28	28	30
Rocky	D1	52	61	65		Rocky	D1	16	17	19
	D2	67	89	92			D2	19	21	22
	D3	121	126	131			D3	22	24	24
	D4	138	169	198			D4	24	26	27
Understory	D1	52	63	71		Understory	D1	18	20	21
	D2	87	93	107			D2	21	22	24
	D3	119	136	152			D3	23	24	26
	D4	164	182	211			D4	25	27	28
	Total Number of Shoot						Number of Shooting Segments
	Test	R1	R2	R3			Test	R1	R2	R3
Grassland	D1	26	37	43		Grassland	D1	12	15	16
	D2	53	68	75			D2	16	18	21
	D3	109	119	157			D3	26	27	30
	D4	71	75	81			D4	25	23	23
Sandy	D1	29	43	51		Sandy	D1	13	16	17
	D2	72	81	94			D2	21	22	24
	D3	138	165	174			D3	27	26	30
	D4	103	113	119			D4	23	23	27
Rocky	D1	19	21	27		Rocky	D1	10	12	13
	D2	32	42	49			D2	14	16	19
	D3	78	67	92			D3	25	27	28
	D4	35	43	41			D4	19	22	21
Understory	D1	20	21	19		Understory	D1	11	13	10
	D2	34	39	46			D2	15	17	20
	D3	81	95	109			D3	25	28	29
	D4	43	52	60			D4	23	20	22
	Number of Seedlings
	Test	R1	R2	R3
Grassland	D1	6	7	9
	D2	13	14	16
	D3	26	27	30
	D4	21	20	23
Sandy	D1	7	8	9
	D2	15	14	18
	D3	27	26	29
	D4	20	23	23
Rocky	D1	5	7	8
	D2	10	9	11
	D3	24	27	25
	D4	19	20	21
Understory	D1	7	6	8
	D2	12	10	13
	D3	24	26	24
	D4	19	19	21

## Sheet: Table 3
	Total Number of Root								Number of Rooting Segments
	Test	R1	R2	R3					Test	R1	R2	R3
Grassland	A1	37	31	34				Grassland	A1	18	14	16
	A2	198	215	204					A2	28	29	26
	A3	90	112	97					A3	22	26	23
	A4	58	73	68					A4	19	23	22
Sandy	A1	18	31	34				Sandy	A1	11	14	12
	A2	214	220	218					A2	29	28	27
	A3	134	139	118					A3	26	25	23
	A4	51	46	60					A4	18	16	19
Rocky	A1	9	15	17				Rocky	A1	5	9	8
	A2	141	142	112					A2	26	28	24
	A3	72	83	68					A3	21	22	18
	A4	25	28	24					A4	12	13	10
Understory	A1	19	21	23				Understory	A1	9	11	13
	A2	163	176	158					A2	27	28	25
	A3	85	101	93					A3	21	24	22
	A4	47	64	59					A4	16	21	19
	Total Number of Shoot								Number of Shooting Segments
	Test	R1	R2	R3					Test	R1	R2	R3
Grassland	A1	31	35	27				Grassland	A1	14	14	13
	A2	159	128	186					A2	28	29	27
	A3	108	101	124					A3	27	26	26
	A4	58	94	72					A4	25	24	22
Sandy	A1	24	22	19				Sandy	A1	10	11	12
	A2	158	189	218					A2	29	28	29
	A3	141	108	178					A3	26	25	27
	A4	58	37	62					A4	24	22	24
Rocky	A1	7	9	12				Rocky	A1	5	6	8
	A2	80	112	75					A2	26	28	25
	A3	50	47	43					A3	25	24	24
	A4	22	27	20					A4	21	20	18
Understory	A1	11	19	15				Understory	A1	7	11	8
	A2	112	138	98					A2	27	28	27
	A3	74	97	68					A3	24	26	24
	A4	43	61	38					A4	21	23	20
	Number of Seedlings
	Test	R1	R2	R3
Grassland	A1	13	14	10
	A2	28	29	26
	A3	24	26	21
	A4	18	20	22
Sandy	A1	10	12	12
	A2	29	28	27
	A3	23	25	22
	A4	22	19	20
Rocky	A1	4	7	8
	A2	26	28	24
	A3	23	23	21
	A4	12	16	11
Understory	A1	7	11	10
	A2	23	27	25
	A3	18	20	17
	A4	13	19	12

## Sheet: Figure 1
		Number of Seedlings
		Month	R1	R2	R3	R4	R5
	Grassland	Feb.	14	17	19	18	15
		Mar.	26	27	29	28	27
		Apr.	28	27	29	29	30
		May	24	22	20	19	25
		Aug.	17	16	13	18	14
		Sep.	21	19	19	22	17
		Oct.	24	24	25	26	22
		Nov.	15	13	12	11	14
	Sandy	Feb.	15	19	19	16	20
		Mar.	24	27	29	25	28
		Apr.	28	26	29	26	30
		May	23	24	19	21	23
		Aug.	21	19	22	18	21
		Sep.	22	21	21	19	23
		Oct.	25	26	28	24	29
		Nov.	13	14	11	10	15
	Rocky	Feb.	9	12	13	8	14
		Mar.	23	25	27	22	28
		Apr.	25	29	25	24	28
		May	22	24	24	21	26
		Aug.	19	20	17	15	21
		Sep.	20	21	23	18	24
		Oct.	22	24	19	20	22
		Nov.	11	13	9	8	10
	Understory	Feb.	11	12	14	9	13
		Mar.	27	29	24	23	28
		Apr.	25	28	29	24	30
		May	22	24	25	20	26
		Aug.	20	19	23	18	22
		Sep.	21	20	25	19	23
		Oct.	25	24	21	20	26
		Nov.	10	11	9	8	12

## Sheet: Figure 2
Net Multiplication Coefficient of Bud Yield									Bud Induction Rate_8th Week
Repeats	Habitats	T1	T2	T3	T4	T5	T6		Repeats	Habitats	T1	T2	T3	T4	T5	T6
1	Grassland	2.88889	3.61111	4.88889	4.22222	3.5	2.16667		1	Grassland	65	52	88	86	63	39
2		2.72222	3.27778	4.5	3.77778	3	2.27778		2		59	49	97	88	54	41
3		3.16667	3.5	4.16667	4.05556	3.22222	2.08889		3		63	57	95	73	58	35
4		2.65	2.91111	4.63889	3.47778	2.68889	2.41667		1	Sandy	35	43	57	68	92.7	78.9
5		3.65	4.02222	4.47222	4.6	3.80556	1.91667		2		39	49	49	57	93.6	84
1	Sandy	1.97778	2.41667	3.3	3.76667	4.75556	4.68889		3		33	51	54	65	96.3	87
2		2.21667	2.73333	2.96111	3.71667	4.91111	4.51667		1	Rocky	32	42	41	53.5	71	74.6
3		1.85556	2.85	3.02778	3.81667	5.13889	4.39444		2		31	44	48	49	63	80.9
4		2.54444	2.13889	2.62778	4.25	4.63889	3.86111		3		35	39	51	55.8	62	77.5
5		1.71111	3.41667	3.63333	3.12778	4.25	3.62778		1	Understory	43.75	51.5	63	75.25	54.5	43.15
1	Rocky	2.31111	2.43889	2.75	3.15	2.68333	3.23889		2		47.25	52.75	66.5	78.75	64.15	47.25
2		2.21667	2.70556	2.95556	2.99444	3.52778	3.8		3		57.75	62.75	77	84	61.55	57.05
3		2.24444	2.63889	2.90556	3.06111	3.29444	3.49444
4		1.98889	2.23889	2.36111	2.47222	3.25	3.07222		Bud Induction Rate_7th Week
5		2.82222	2.97222	3.25	3.40556	3.19444	3.32222		Repeats	Habitats	T1	T2	T3	T4	T5	T6
1	Understory	2.86667	3.27222	4.11667	4.18333	3.96111	3.30556		1	Grassland	61	47	83	83	57	37
2		3.16111	3.46111	4.30556	4.47222	4.13889	3.52222		2		55	46	93	76	49	39
3		2.63333	3.02778	3.91667	4.01111	3.73333	3.21667		3		59	53	91	79	52	33
4		2.32222	2.62778	3.69444	3.82222	3.40556	2.90556		1	Sandy	32	41	54	65	85.5	81
5		3.4	3.75	4.63889	4.91667	4.45556	3.98889		2		36	45	46	54	90.9	75
									3		31	47	51	63	99.9	83
									1	Rocky	29	41	42	53	71	73
									2		34	42	43	44	64	81
									3		31	36	51	52	58	72
									1	Understory	38.5	50.25	57.75	71.75	54.25	42.75
									2		42	51.75	59.5	73.5	55.75	52.75
									3		54.25	55.25	71.75	75.25	60.75	44.25
									Bud Induction Rate_6th Week
									Repeats	Habitats	T1	T2	T3	T4	T5	T6
									1	Grassland	51	41	73	77	47	32
									2		45	41	82	59	41	31
									3		49	43	81	69	42	32
									1	Sandy	29	39	51	61	75	71
									2		33	42	42	51	81	68
									3		28	43	47	58	91	69
									1	Rocky	25	37	39	47	61	63
									2		31	38	41	44	54	71
									3		28	35	48	46	51	62
									1	Understory	31.5	43.5	45	57	46.5	47
									2		33	52.5	48	63	49.5	40
									3		37.5	49.5	55.5	61.5	46.5	43
									Bud Induction Rate_5th Week
									Repeats	Habitats	T1	T2	T3	T4	T5	T6
									1	Grassland	41	39	63	55	42	31
									2		45	38	72	59	38	29
									3		43	43	71	56	42	32
									1	Sandy	26	37	45	55	65	67
									2		31	41	42	51	71	65
									3		27	41	44	54	73	63
									1	Rocky	23	34	38	43	53	57
									2		27	37	41	44	52	61
									3		26	35	43	41	51	54
									1	Understory	25.2	28.8	39.6	43.2	37.2	37
									2		26.4	39.6	38.4	50.4	39.6	39.5
									3		27.6	39.6	39.6	49.2	33.6	30.5
									Bud Induction Rate_4th Week
									Repeats	Habitats	T1	T2	T3	T4	T5	T6
									1	Grassland	35	35	53	46	42	31
									2		41	34	54	49	35	27
									3		39	41	51	47	39	32
									1	Sandy	26	37	41	51	55	61
									2		29	36	42	38	51	55
									3		27	41	39	54	53	53
									1	Rocky	23	34	38	36	48	52
									2		24	33	36	44	49	51
									3		22	32	41	38	47	48
									1	Understory	21	24	31	35	31	29
									2		22	31	32	42	32	31
									3		22	33	33	41	27	32
									Bud Induction Rate_3rd Week
									Repeats	Habitats	T1	T2	T3	T4	T5	T6
									1	Grassland	31	31	46	41	37	29
									2		36	34	44	43	35	26
									3		33	41	48	42	33	31
									1	Sandy	23	33	37	44	45	47
									2		26	32	36	38	41	45
									3		24	35	34	45	43	43
									1	Rocky	21	31	33	36	41	42
									2		23	28	31	34	42	41
									3		22	30	35	35	43	44
									1	Understory	19	22	28	32	28	27
									2		22	27	29	38	31	29
									3		23	24	32	37	26	31
									Bud Induction Rate_2nd Week
									Repeats	Habitats	T1	T2	T3	T4	T5	T6
									1	Grassland	31	31	42	36	33	29
									2		32	32	41	37	31	26
									3		29	37	43	39	31	27
									1	Sandy	21	31	33	41	42	43
									2		21	32	31	36	41	41
									3		22	32	34	42	43	43
									1	Rocky	18	27	27	32	31	34
									2		21	28	31	31	32	35
									3		22	26	32	31	35	34
									1	Understory	21	22	22	27	28	24
									2		17	21	25	28	29	25
									3		18	19	26	33	25	31
									Bud Induction Rate_1st Week
									Repeats	Habitats	T1	T2	T3	T4	T5	T6
									1	Grassland	21	31	42	32	26	21
									2		22	32	41	33	31	25
									3		29	34	37	35	28	24
									1	Sandy	19	26	33	41	38	36
									2		21	31	28	36	41	41
									3		22	32	34	36	35	41
									1	Rocky	18	19	27	28	31	34
									2		17	21	31	31	32	31
									3		22	23	24	29	32	34
									1	Understory	15	16	22	27	22	24
									2		17	21	21	28	21	25
									3		18	19	22	23	25	28

## Sheet: Figure 3
	Net Multiplication Coefficient of Shoot									Length of Shoot (cm)									Diameter of Shoot (mm)
	Repeats	Habitats	T1	T2	T3	T4	T5	T6		Repeats	Habitats	T1	T2	T3	T4	T5	T6		Repeats	Habitats	T1	T2	T3	T4	T5	T6
	1	Grassland	3.91	5.13	5.72	6.52	5.13	3.92		1	Grassland	5.5	5.2	6.8	7.8	4.3	3.9		1	Grassland	3.15	3.25	3.46	4.07	3.81	3.03
	2		3.63	4.92	4.93	6.41	4.93	4.31		2		5.3	4.9	6.4	6.7	5.4	4.1		2		3.29	3.39	3.18	4.11	3.57	3.14
	3		3.23	5.63	6.12	7.32	5.41	3.73		3		4.9	4.7	5.9	7.5	4.8	3.5		3		2.89	3.17	3.33	3.98	4.15	3.35
	4		4.11	3.62	5.53	5.33	3.97	4.72		4		4.2	3.9	7.4	8.3	3.8	3.3		4		2.61	2.77	2.82	3.75	3.34	2.74
	5		4.51	4.13	4.52	5.82	5.03	3.41		5		6.3	5.9	5.3	6.4	5.8	4.3		5		3.6	3.7	3.8	4.6	4.3	3.1
	1	Sandy	3.43	3.93	4.83	5.93	6.18	6.58		1	Sandy	4.5	4.3	5.3	5.8	6.1	6.8		1	Sandy	2.32	2.35	2.81	3.43	4.23	3.3
	2		4.16	5.46	5.56	5.06	6.86	7.36		2		3.9	4.9	4.9	6.2	7.2	7.4		2		1.93	2.61	2.43	2.95	3.98	3.93
	3		3.57	4.57	4.97	4.07	6.07	6.67		3		4.1	5.1	6.1	5.5	6.5	7.3		3		2.04	2.17	2.74	3.26	4.45	3.55
	4		3.36	4.66	4.76	4.86	5.86	6.36		4		3.17	3.77	4.43	4.83	5.6	6.17		4		1.7	1.88	2.16	2.71	3.62	3.09
	5		3.05	3.55	4.15	4.95	5.35	5.95		5		5.3	5.7	6.5	5.8	7.6	8.3		5		2.6	2.8	3.2	3.6	4.6	4.1
	1	Rocky	3.25	4.18	4.03	5.57	5.68	4.08		1	Rocky	3.2	3.5	3.7	4.8	5.4	5.8		1	Rocky	2.11	1.84	2.32	2.43	2.08	2.82
	2		4.06	4.38	3.56	4.88	4.96	3.46		2		3.7	3.4	4.8	4.9	5.9	5.4		2		1.62	2.26	2.44	2.15	2.49	2.84
	3		3.36	3.67	4.37	3.77	5.47	4.37		3		3.5	4.2	4.4	5.2	6.2	5.7		3		2.23	2.17	1.97	2.26	2.56	3.17
	4		3.25	4.76	3.76	4.99	5.96	4.56		4		2.27	2.4	3.3	3.97	4.33	4.43		4		1.75	1.59	1.74	1.78	2.48	2.61
	5		2.75	4.25	3.15	4.63	6.35	5.25		5		4.67	5.1	5.3	5.7	7.4	6.5		5		2.4	2.5	2.7	2.8	3.19	3.4
	1	Understory	3.58	3.98	5.23	4.57	4.34	4.25		1	Understory	4.5	5.4	7.8	7.4	6.6	4.9		1	Understory	2.52	2.82	3.71	3.42	2.34	1.91
	2		4.05	4.35	4.43	5.88	4.96	3.45		2		3.7	5.5	8.7	7.7	6.8	5.2		2		2.73	2.93	4.03	3.15	2.52	2.42
	3		3.42	3.42	6.33	4.07	3.77	4.37		3		5.3	5.7	8.1	7.1	6.4	5.4		3		2.34	2.78	3.45	3.21	2.78	2.44
	4		3.02	3.22	4.98	4.99	4.26	3.96		4		3	4.53	6.73	6.4	5.6	4.17		4		2.03	2.34	3.93	2.76	2.95	1.76
	5		3.35	4.05	5.43	4.63	4.35	4.69		5		6.1	6.5	8.3	7.3	7.6	6.2		5		3.01	3.4	4.3	3.71	3.4	2.8

## Sheet: Figure 4
Seedling Yield
Repeats	Habitats	Seedling Induction Rate%	Shoot Number	Bud Number	Root Number
1	Grassland	90	4.66	4.12	7.9
2		96.6667	5.20571	4.06	8.85
3		86.6667	4.31143	3.92	8.25
4		93.3333	4.83429	3.59	7.31
5		93.3333	3.8	4.64	9.35
1	Sandy	96.6667	3.52571	5.79	8.4
2		93.3333	3.46286	4.62	8.15
3		96.6667	4.18286	4.29	8.75
4		90	3.04571	4.06	7.4
5		90	3.32571	3.75	9.6
1	Rocky	86.6667	2.98857	2.06	6.9
2		76.6667	2.53143	2.91	6.45
3		80	3.61714	2.53	5.6
4		90	2.84571	2.3	5.31
5		83.3333	3.10286	2.46	7.34
1	Understory	86.6667	3.24571	3.43	4.8
2		90	2.73429	3.59	4.9
3		83.3333	3.12571	3.66	5.2
4		83.3333	3.30571	3.08	3.97
5		93.3333	3.72857	4.07	5.98

## Sheet: Figure 5
Mantel Test Analysis
Repeats	Habitats	SIR	SN	BN	RN	NS	DS	LS	SI	NB	BI	NR	LR	RI
1	Grassland	90	4.66	4.12	7.9	6.52	4.07	7.8	93.33	4.88889	88.89	7.9	8.8	93.3333
2		96.6667	5.20571	4.06	8.85	6.41	4.11	6.7	96.67	4.5	97.23	8.85	9.1	96.6667
3		86.6667	4.31143	3.92	8.25	7.32	3.98	7.5	90.34	4.16667	95.42	8.25	9.5	86.6667
4		93.3333	4.83429	3.59	7.31	5.33	3.75	8.3	91.23	4.63889	93.33	7.31	9.13333	92.2222
5		93.3333	3.8	4.64	9.35	5.82	4.6	6.4	92.34	4.47222	92.24	9.35	9.25	91.3453
1	Sandy	96.6667	3.52571	5.79	8.4	6.58	4.23	6.8	96.67	4.75556	92.77	8.7	10.8	96.6667
2		93.3333	3.46286	4.62	8.15	7.36	3.98	7.4	93.33	4.91111	93.63	8.15	10.4	93.3333
3		96.6667	4.18286	4.29	8.75	6.67	4.45	7.3	96.67	5.13889	96.36	9.05	11.7	90.3333
4		90	3.04571	4.06	7.4	6.36	3.62	6.17	94.23	4.63889	94.25	7.5	10.9667	93.3333
5		90	3.32571	3.75	9.6	5.95	4.6	8.3	95.56	4.25	93.23	9.4	10.58	90.1111
1	Rocky	86.6667	2.98857	2.06	6.9	5.68	2.82	5.4	86.67	3.23889	78.76	6.9	6.2	86.6667
2		76.6667	2.53143	2.91	6.45	4.96	2.84	5.9	91.33	3.8	84.34	6.45	6.14	93.3333
3		80	3.61714	2.53	5.6	5.47	3.17	6.2	83.33	3.49444	77.45	5.6	6.28	80.3333
4		90	2.84571	2.3	5.31	5.96	2.61	4.33	81.78	3.07222	79.67	5.31	6.20667	86.6667
5		83.3333	3.10286	2.46	7.34	6.35	3.4	7.4	80.32	3.32222	74.56	7.34	6.05	85.7778
1	Understory	86.6667	3.24571	3.43	4.8	5.23	3.71	7.8	90.34	4.18333	75.25	4.8	5.31	90.1111
2		90	2.73429	3.59	4.9	4.43	4.03	8.7	93.33	4.47222	78.75	4.9	5.52	93.3333
3		83.3333	3.12571	3.66	5.2	6.33	3.45	8.1	91.26	4.01111	84.56	5.2	5.38	83.3333
4		83.3333	3.30571	3.08	3.97	4.98	3.93	6.73	87.35	3.82222	79.33	3.97	5.40333	88.8889
5		93.3333	3.72857	4.07	5.98	5.43	4.3	8.3	85.79	4.91667	78.78	5.98	5.35	87.7778
